# Supplementary material for: Transcriptome analysis provides insight into prickle development and its link to defense and secondary metabolism in Solanum viarumDunal
Source: PubMed Central journal article supplement (PMC6244164; doi:10.1038/s41598-018-35304-8), 2018-11-20
Supplement: 41598_2018_35304_MOESM1_ESM.pdf [file 41598_2018_35304_MOESM1_ESM.pdf]

**Transcriptome analysis provides insight into prickly development and its link to defense and secondary metabolism in *Solanum viarum* Dunal**

Shatrujeet Pandey<sup>1,2</sup>, Ridhi Goel<sup>1</sup>, Archana Bhardwaj<sup>1</sup>, Mehar H. Asif<sup>1</sup>, Samir V. Sawant<sup>1,\*</sup>, Pratibha Misra<sup>1\*</sup>

<sup>1</sup>Council of Scientific and Industrial Research - National Botanical Research Institute, Lucknow-226001, India

<sup>2</sup>Academy of Scientific and Innovative Research (AcSIR), New Delhi-110 001, India

\*Corresponding author [samirsawant@nbri.res.in](mailto:samirsawant@nbri.res.in); [pratibhamisra@nbri.res.in](mailto:pratibhamisra@nbri.res.in);

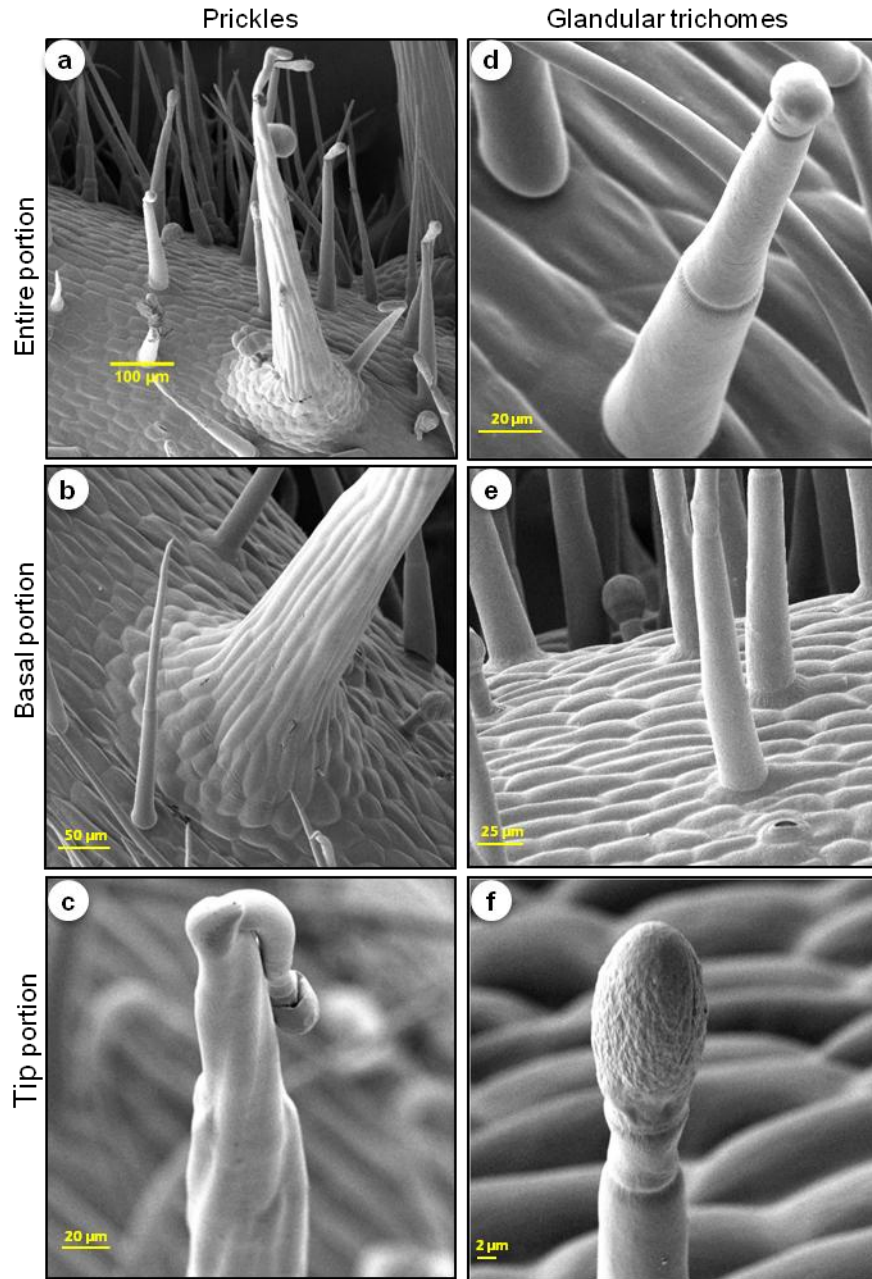

**Supplementary Figure S1.** Morphological similarity and differences between glandular prickle and glandular trichome of *S. viarum*. (a) Complete prickly hair. (b) Basal portion of prickly hair. (c) Tip portion of prickly hair showing GT attached to prickly hair. (d) Multicellular glandular trichome. (e) Base of trichomes. (f) Head of GTs.

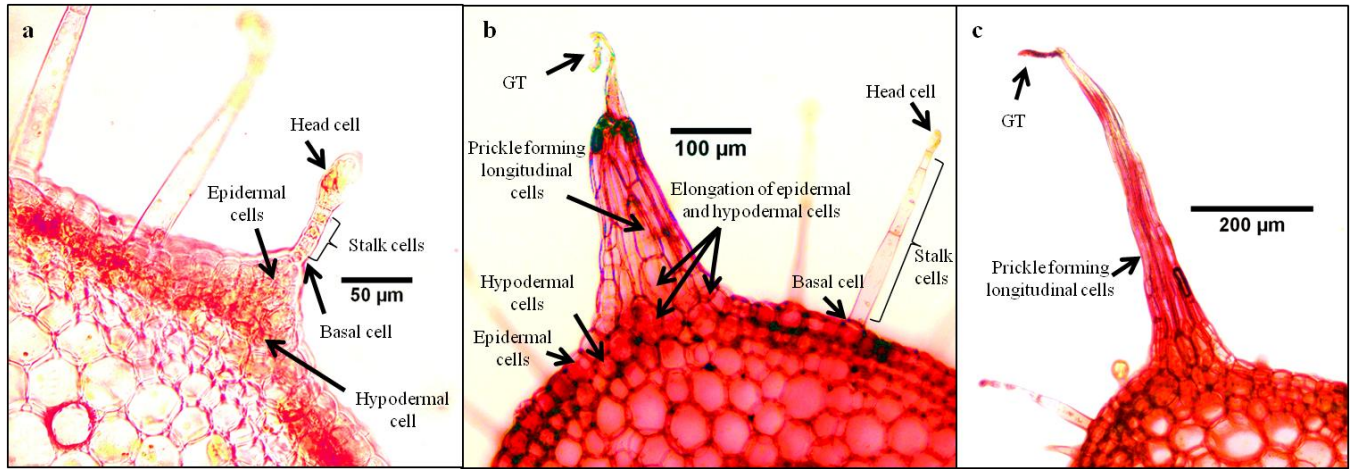

**Supplementary Figure S2.** T. S. of prickly stem showing different stages of prickles development in *S. viarum*. (a) Initiation of prickles formation beneath the basal cell of GT. (b) Developing prickly stem with GT attached to the tip. (c) Mature prickly stem with GT attached to the tip.

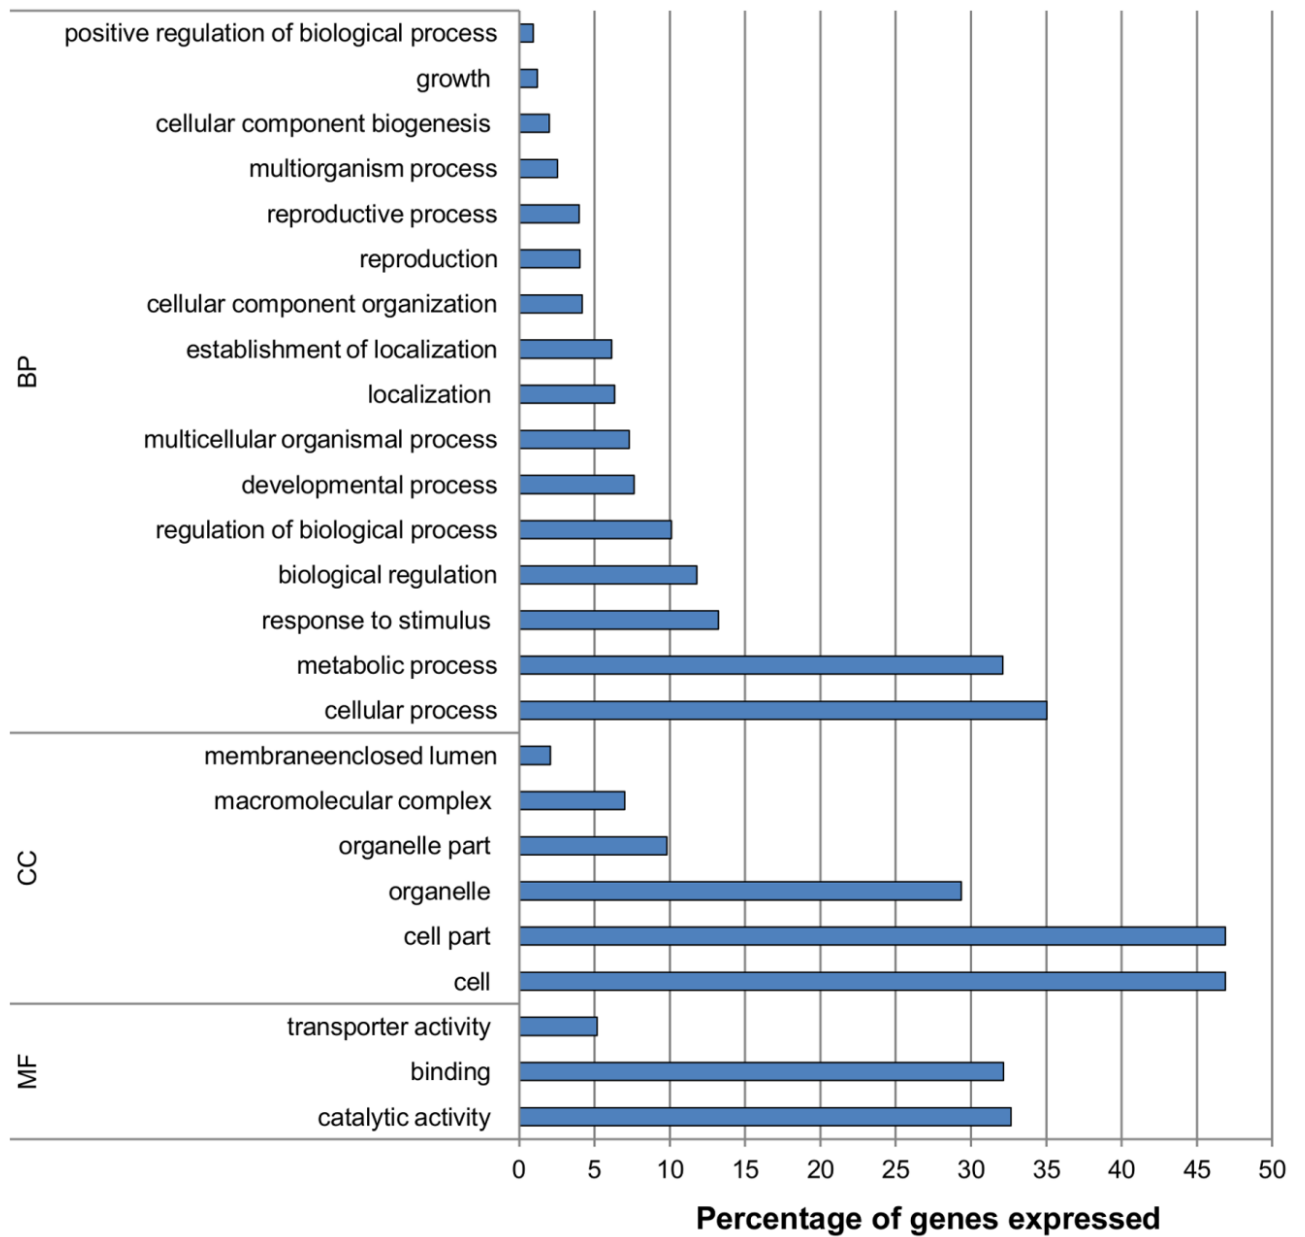

**Supplementary Figure S3.** Functional categorization of genes expressed in the epidermis of *S. viarum* through GO analysis.

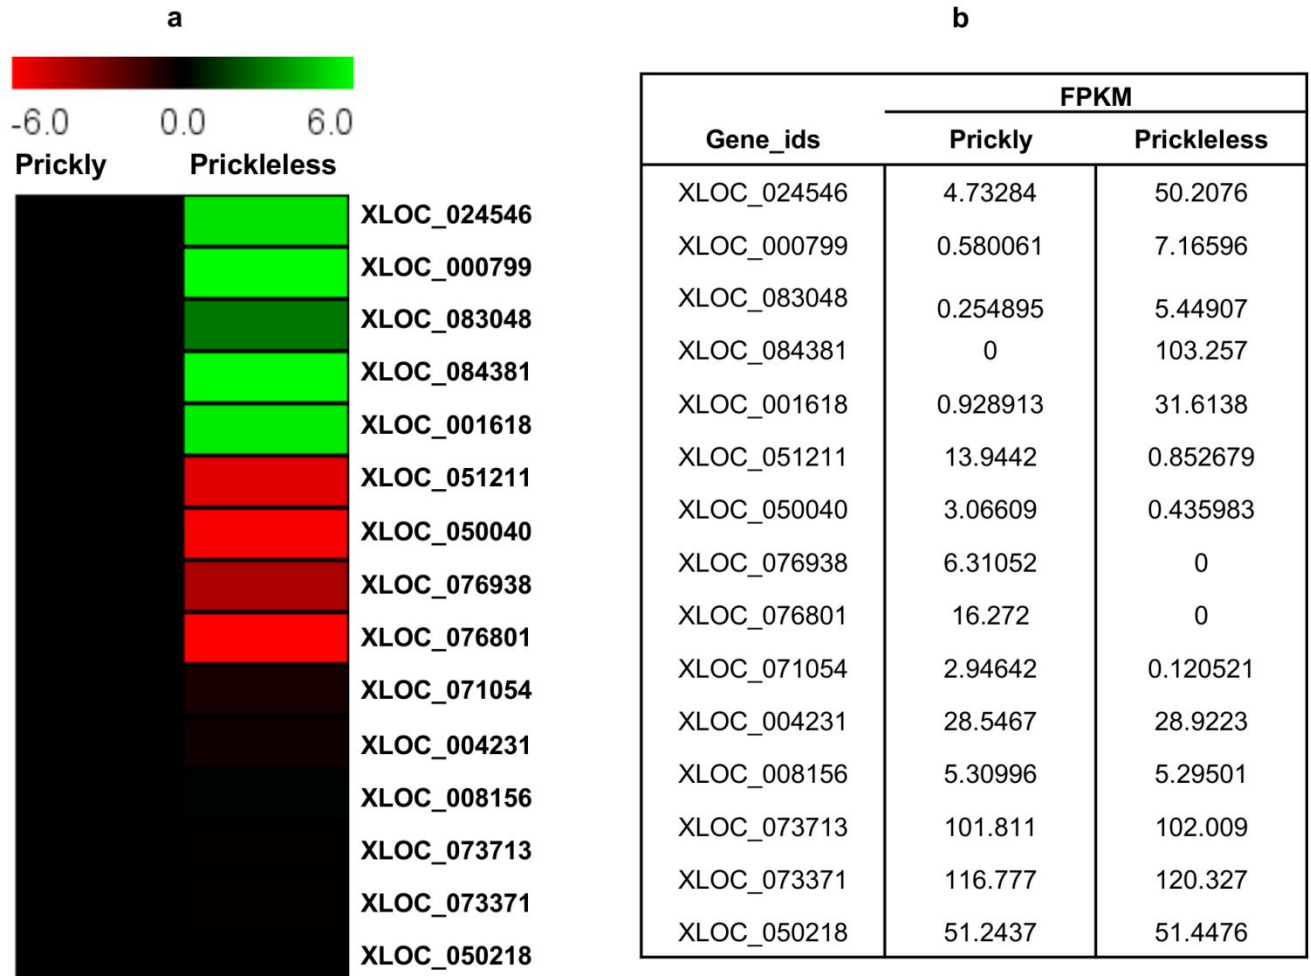

**Supplementary Figure S4.** qRT-PCR of some randomly selected highly up-regulated, down-regulated and similarly expressed genes for validation of transcriptome data of *S. viarum*. (a) Relative expression pattern analyzed through qRT-PCR. (b) FPKM based digital gene expression pattern analyzed through RNA-seq.

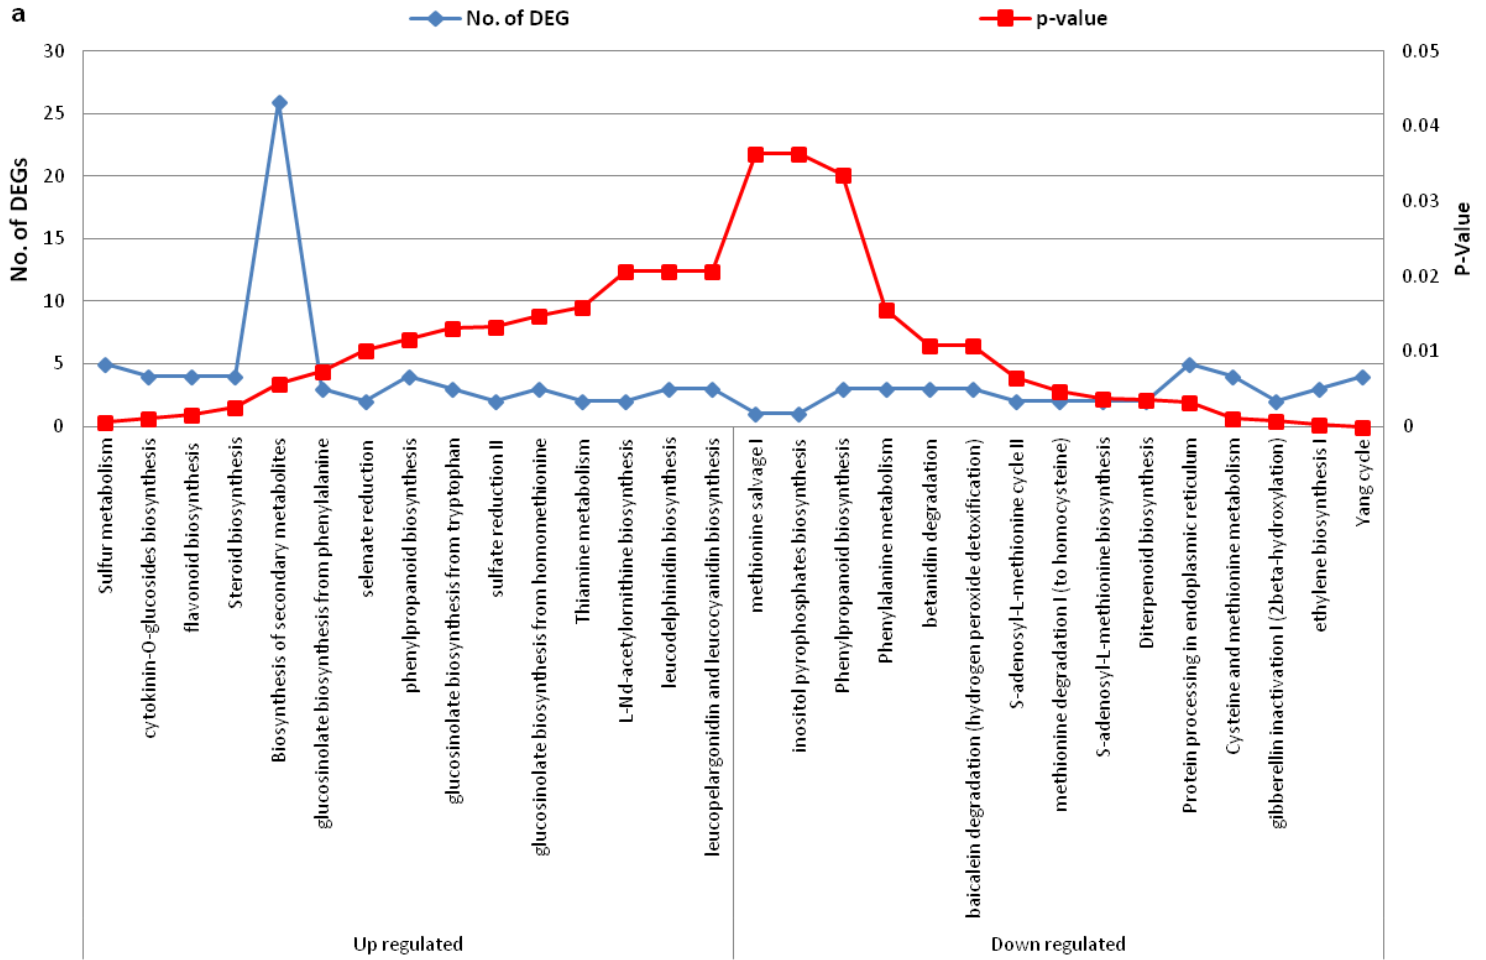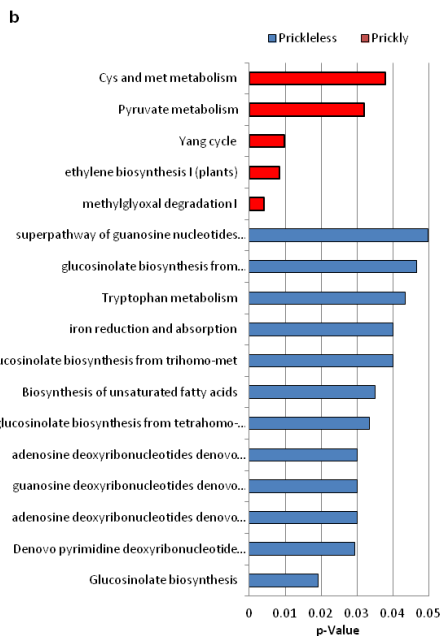

**Supplementary Figure S5.** Metabolic pathways altered in prickless mutant of *S. viarum*. (a) Top 15 up and 15 down regulated pathways. (b) Uniquely expressed genes enriched to metabolic pathways significantly altered in prickly and prickless mutant. Pathways with p-value  $\leq 0.05$  were considered statistically significant.



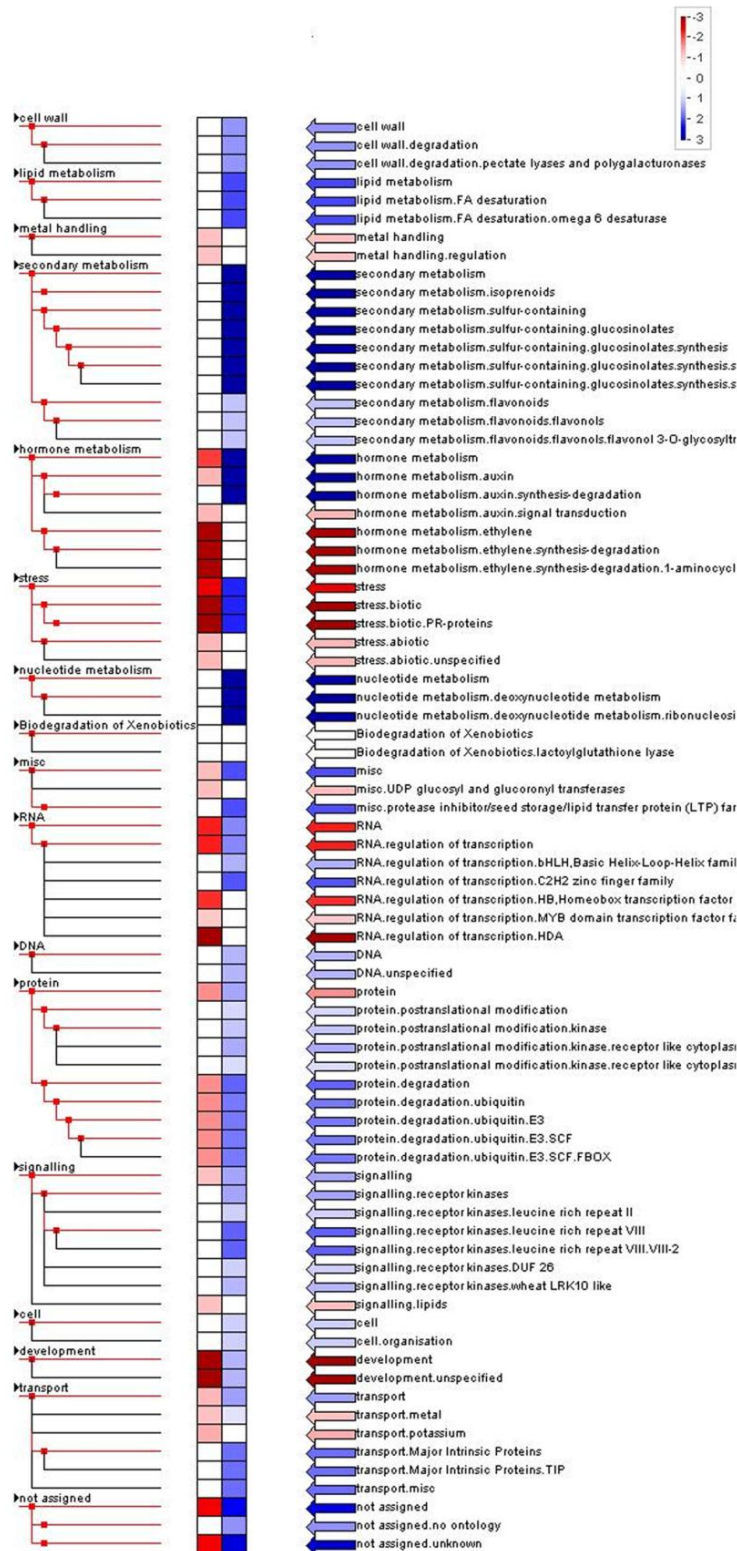

**Supplementary Figure S7.** PageMan analysis of uniquely expressed genes in epidermis of prickly or prickless mutant of *S. viarum*.



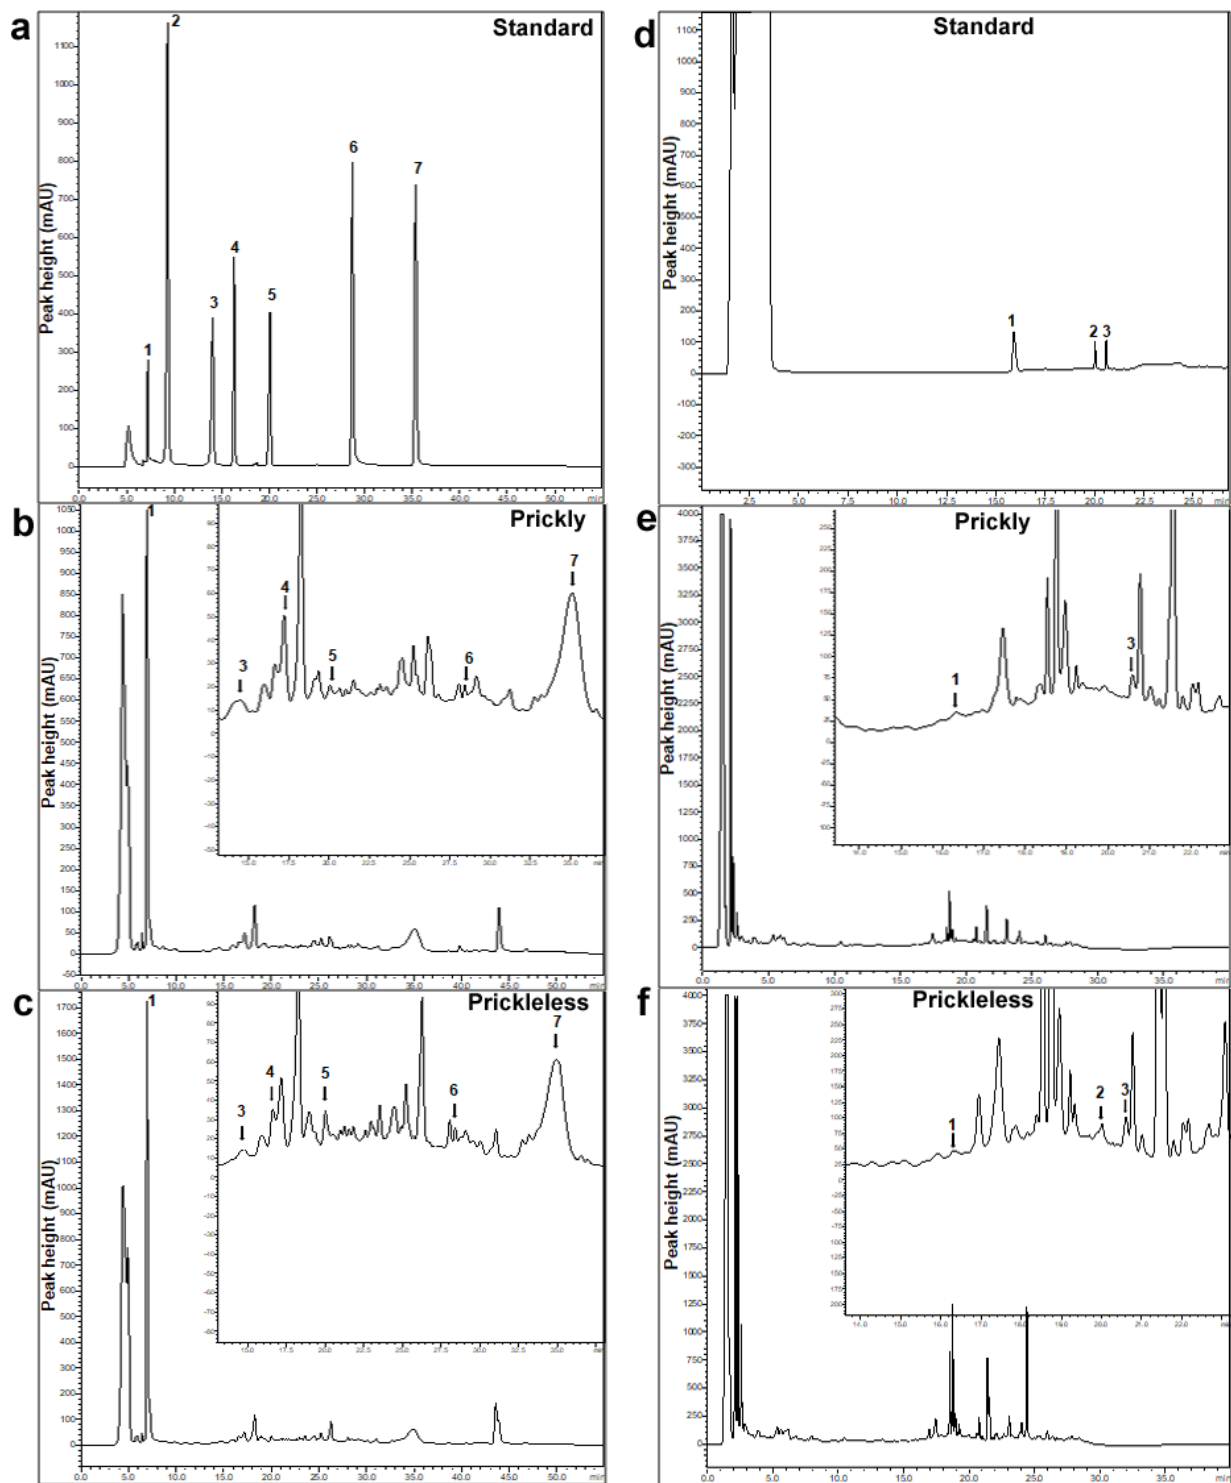

**Supplementary Figure S8.** HPLC chromatogram of the standard and crude extract of prickly and prickless *S. viarum*. a-c) phenolics and flavonoid [ gallic acid -1, chlorogenic acid -2, caffeic acid-3, rutin-4, ferulic acid-4, quercetin-6, kaempferol-7. (d-f) alkaloid [ $\alpha$ -solanine-1, solanidine-2, solasodine-3].

**Supplementary Table S1.** Summary of the transcriptome sequencing, *de novo* assembly and annotation of *S. viarum*.

|                                            | Prickly           |                   | Prickleless       |                   |
|--------------------------------------------|-------------------|-------------------|-------------------|-------------------|
|                                            | R1                | R2                | R1                | R2                |
| <b>No. Of Reads</b>                        | 18175222          | 15851932          | 17096127          | 13586099          |
| <b>No. of HQ reads</b>                     | 17444985 (95.98%) | 15153863 (95.60%) | 16429445 (96.10%) | 12992487 (95.63%) |
| <b>No. of Contigs</b>                      | 150880            |                   | 142861            |                   |
| <b>Largest Contig (bp)</b>                 | 59569             |                   | 46421             |                   |
| <b>Smallest contig(bp)</b>                 | 201               |                   | 201               |                   |
| <b>Average Length (bp)</b>                 | 1126.75           |                   | 1117.51           |                   |
| <b>GC%</b>                                 | 46.11%            |                   | 46.70%            |                   |
| <b>NR Annotated transcript</b>             | 73189             |                   | 70970             |                   |
| <b>No. of transcripts after clustering</b> | 156926            |                   |                   |                   |
| <b>Largest Contig</b>                      | 59569             |                   |                   |                   |
| <b>Smallest contig</b>                     | 201               |                   |                   |                   |
| <b>Average Length</b>                      | 1110.9            |                   |                   |                   |
| <b>GC%</b>                                 | 39.30%            |                   |                   |                   |
| <b>TAIR Annotated transcripts</b>          | 62975             |                   |                   |                   |
| <b>TAIR Unannotated transcripts</b>        | 93951             |                   |                   |                   |
| <b>Tomato Annotated transcripts</b>        | 67752             |                   |                   |                   |
| <b>Tomato Unannotated transcripts</b>      | 89174             |                   |                   |                   |

**Supplementary Table S4.** List of the top 15 up and 15 down-regulated genes in epidermis of prickly vs. prickless mutant of *S. viarum*.

| Gene_Ids    | Prickly vs. Prickleless (fold change) | p-value | Plant GD ID      | Description                                                        | TAIR10 Ids  | Tomato Ids         |
|-------------|---------------------------------------|---------|------------------|--------------------------------------------------------------------|-------------|--------------------|
| XLOC_064742 | -5.118538307                          | 0.00005 | YCX91_PHAAO      | Uncharacterized protein ORF91                                      | NA          | NA                 |
| XLOC_079911 | -4.697050957                          | 0.00005 | NA               | NA                                                                 | NA          | NA                 |
| XLOC_066158 | -4.656741736                          | 0.00005 | YCF1A_MARPO      | Putative membrane protein ycf1 N-terminal part; AltName: ORF 1068; | NA          | NA                 |
| XLOC_071054 | -4.611606642                          | 0.00005 | C5XHE6_SORBI     | Putative uncharacterized protein Sb03g011550                       | NA          | NA                 |
| XLOC_065300 | -4.596655786                          | 0.00005 | Q40502_TOBAC     | Extensin                                                           | NA          | NA                 |
| XLOC_051211 | -4.031518631                          | 0.00005 | B9HID6_POPTR     | DEFORMED ROOTS AND LEAVES 1 family protein                         | AT1G13870.1 | Solyc08g008250.1.1 |
| XLOC_076801 | -4.024319679                          | 0.00005 | F6HF70_VITVI     | Putative uncharacterized protein                                   | AT2G03440.1 | Solyc04g005480.1.1 |
| XLOC_067196 | -3.927747592                          | 0.00015 | F6HH27_VITVI     | Putative uncharacterized protein                                   | AT3G22440.1 | Solyc11g071340.1.1 |
| XLOC_062280 | -3.897727126                          | 0.00035 | Q0MX19_ARAH<br>Y | Leucine rich protein                                               | NA          | NA                 |
| XLOC_085802 | -3.82662512                           | 0.00005 | E3W9P7_TOBA<br>C | Putative PR-10 type pathogenesis-related protein                   | AT1G70890.1 | Solyc04g007010.2.1 |
| XLOC_065725 | -3.796462781                          | 0.00005 | B3VI97_SOLDE     | Putative disease resistance protein CC-NBS-LRR (Fragment)          | AT3G14460.1 | Solyc08g007630.1.1 |
| XLOC_051029 | -3.684004197                          | 0.0001  | Q93YD2_TOBA<br>C | Putative translocation transactivator                              | NA          | Solyc08g044450.1.1 |
| XLOC_042610 | -3.682356673                          | 0.00005 | Q39467_CAPAN     | Sn-2 protein (MLP-like protein 34)                                 | AT5G28010.1 | Solyc04g007770.2.1 |
| XLOC_024732 | -3.652715931                          | 0.00005 | D7LTE8_ARAL<br>L | Amino acid transporter, putative                                   | NA          | NA                 |
| XLOC_038231 | -3.596861021                          | 0.00005 | E7D4U5_TOBA<br>C | Cysteine protease                                                  | AT5G45890.1 | Solyc02g076910.2.1 |
| XLOC_084381 | 6.690095778                           | 0.00005 | F2CZR9_HORV<br>D | Predicted protein (Uncharacterized protein)                        | NA          | NA                 |
| XLOC_007885 | 6.004369091                           | 0.00005 | B9GNI9_POPTR     | Uncharacterized protein                                            | AT5G48850.1 | Solyc06g007970.2.1 |
| XLOC_031857 | 5.987186837                           | 0.00005 | B9S545_RICCO     | Putative uncharacterized protein                                   | AT5G48850.1 | Solyc06g007970.2.1 |
| XLOC_002160 | 5.647052243                           | 0.00095 | B3SP99_CAPAN     | Fatty acid desaturase                                              | AT3G12120.2 | Solyc01g006430.2.1 |
| XLOC_085535 | 5.481334466                           | 0.00005 | PRS2_SOLTU       | Pathogenesis-related protein STH-2                                 | NA          | Solyc09g091000.2.1 |

|             |             |         |                  |                                                                                     |             |                    |
|-------------|-------------|---------|------------------|-------------------------------------------------------------------------------------|-------------|--------------------|
| XLOC_023238 | 5.201494901 | 0.00005 | A5BSN3_VITVI     | Putative uncharacterized protein                                                    | AT1G22400.1 | Solyc04g074330.2.1 |
| XLOC_005604 | 5.10395771  | 0.00005 | Q9LM08_CAPA<br>N | Pepper esterase                                                                     | AT5G62180.1 | Solyc06g035520.2.1 |
| XLOC_001618 | 5.088867165 | 0.00005 | B9HUS6_POPTR     | Homocysteine S-methyltransferase 3<br>family protein                                | AT3G63250.1 | Solyc09g082460.2.1 |
| XLOC_034413 | 5.07700713  | 0.0002  | B9RP37_RICCO     | Putative uncharacterized protein                                                    | NA          | NA                 |
| XLOC_018784 | 4.961102747 | 0.0003  | A2Q1J3_MEDT<br>R | DUF506 family protein                                                               | AT1G12030.1 | Solyc11g012120.1.1 |
| XLOC_015461 | 4.911130691 | 0.00005 | D7MJF9_ARAL<br>L | Putative uncharacterized protein                                                    | NA          | NA                 |
| XLOC_030037 | 4.709704193 | 0.00005 | D5KXD2_SOLL<br>C | Beta caryophyllene/humulene<br>synthase (Caryophyllene/alpha-<br>humulene synthase) | AT3G14540.1 | Solyc06g059930.2.1 |
| XLOC_019256 | 4.564999303 | 0.00005 | C6TGT6_SOYB<br>N | Uncharacterized protein                                                             | AT3G63030.1 | Solyc06g084400.2.1 |
| XLOC_022696 | 4.457186326 | 0.00005 | B9TIC7_RICCO     | Cytochrome P450, putative (EC<br>1.14.13.76) (Fragment)                             | NA          | NA                 |
| XLOC_083048 | 4.418035045 | 0.0002  | P93789_SOLTU     | UDP-galactose:solanidine<br>galactosyltransferase                                   | AT2G36790.1 | Solyc07g043490.1.1 |

**Supplementary Table S6.** List of the primers used for qRT-PCR analysis.

| <b>Selected primers used for transcriptome data validation</b>                        |                 |                                 |                           |                         |
|---------------------------------------------------------------------------------------|-----------------|---------------------------------|---------------------------|-------------------------|
| <b>Sl. No.</b>                                                                        | <b>Gene Ids</b> | <b>Primer Sequence 5' to 3'</b> |                           |                         |
|                                                                                       |                 | <b>Forward</b>                  |                           | <b>Reverse</b>          |
| 1                                                                                     | XLOC_024546     | CCATTCCACCAGCCCATCT             |                           | CGCCACATCGTTGTTTG       |
| 2                                                                                     | XLOC_000799     | CAAAAAATGAGCACGTGAGAAAA         |                           | CGCCCCAAGCTAACTTCTT     |
| 3                                                                                     | XLOC_083048     | CCAGCCTACCATTGATGACGA           |                           | TGGCAGTGTGAAGCTCTCA     |
| 4                                                                                     | XLOC_084381     | GGAAAGCCGGTGA CTCTCAA           |                           | TCGTCTGCTCTGCTTCGTTT    |
| 5                                                                                     | XLOC_001618     | AGGCAACTCTTCAGGGATTT            |                           | TCTCTACGCTTCTTTTGAGCA   |
| 6                                                                                     | XLOC_051211     | TGTTTGGCTAGAGCAGCAGG            |                           | ACGGTTCCTCTCTCACGA      |
| 7                                                                                     | XLOC_050040     | GCTTCATTGCGTGCTTGTTG            |                           | TATCGCCTTATCTTCACCATTCC |
| 8                                                                                     | XLOC_076938     | CGAAAGGAGATAGAGAAGATGGAAGA      |                           | CCTTTTCTAACTCCACCGTGTGT |
| 9                                                                                     | XLOC_076801     | CGGTTGTTGTGGTGGTAGA             |                           | ATTCGTCGGAAAAGCAGAG     |
| 10                                                                                    | XLOC_071054     | TCAGGCATTGAGTTTGTGTA            |                           | CTCGGGCATTGTTGTTTTAC    |
| 11                                                                                    | XLOC_004231     | TGCGAAGCAGAGACCATAACAGT         |                           | GGAGGACCCAGAACGGAATT    |
| 12                                                                                    | XLOC_008156     | GGTGATTCTTGGTCTCCTTTCC          |                           | CACGCTAAGGAGGCTGCAA     |
| 13                                                                                    | XLOC_073713     | GCATTCAACCCATCAGAGCAA           |                           | TTGTCTTCCCACCACTCTGTGA  |
| 14                                                                                    | XLOC_073371     | CGGCTGTGGTGGTAAAGAG             |                           | TCTGGCAGGGCGTGATCT      |
| 15                                                                                    | XLOC_050218     | CCACAGCGGGCAACAGTAA             |                           | TCTCCGTGGTGGTTTTTAGGTT  |
| <b>Selected primers used for the expression analysis of transcription factors</b>     |                 |                                 |                           |                         |
| <b>Sl. No.</b>                                                                        | <b>Gene Ids</b> | <b>Gene names</b>               | <b>Forward</b>            | <b>Reverse</b>          |
| 1                                                                                     | XLOC_067399     | REM                             | TTGAAGCTGAATGGACATCG      | CCCAATTGCACATTATGATCC   |
| 2                                                                                     | XLOC_040694     | MSM1                            | TGGACTCATTGTTTTTCTGCTACTG | CCCTTTCTGACTGCGTCTTGT   |
| 3                                                                                     | XLOC_050040     | C2C2-CO-like                    | GCTTCATTGCGTGCTTGTTG      | TATCGCCTTATCTTCACCATTCC |
| 4                                                                                     | XLOC_051211     | DRL1                            | TGTTTGGCTAGAGCAGCAGG      | ACGGTTCCTCTCTCACGA      |
| 5                                                                                     | XLOC_027183     | Homeobox                        | TCTTCCATCTAGCTCGCCTG      | TGCTAAAGAGTTGGGTGTTCC   |
| 6                                                                                     | XLOC_075558     | R2R3-MYB                        | ATGTGGTCATATTCCTCTGGTTG   | GGACCTCTCTCAATCCA ACTCT |
| 7                                                                                     | XLOC_035637     | HAP2                            | GACGAATGGAAGCATCAACGA     | TGCATACATCAGACTGCACAAC  |
| <b>Selected primers used for expression analysis of secondary metabolite pathways</b> |                 |                                 |                           |                         |
| 1                                                                                     | XLOC_009213     | FLS1                            | ATTTGTGAGCCCCTTCCAC       | TTGCACCCATTTTTCTCCA     |
| 2                                                                                     | XLOC_034589     | CHS                             | GAAGGTCGAAGCCCAAGAA       | GCCAAGCCAAGTCCAAAAT     |
| 3                                                                                     | XLOC_084597     | CFI                             | TTCCATGTCCCATCAAAGGT      | TGAAGTGGTGGTGGATGAAA    |
| 4                                                                                     | XLOC_025921     | COMT                            | CAAAAAGCGTGGTTGGAGTT      | TTTTGGTTCTTCCACGCAAT    |
| 5                                                                                     | XLOC_052049     | 4CL                             | GGCAAGGTCTCTCCACTTTCAG    | TGAGGAAACAGACCGGTATGG   |
